# Supplementary material for: Chiroptically Active Multi-Modal Calcium Carbonate-Based Nanocomposites
Source: MDPI journal article supplement (doi:10.3390/nano14010100), 2023-12-31
Supplement: s1 [file s1]

## Supporting Information

### Chiroptically Active Multi-Modal Calcium Carbonate-Based Nanocomposites

Fearghal C. Donnelly,<sup>1,2</sup> Finn Purcell-Milton,<sup>3</sup> Eoin Caffrey,<sup>4</sup> Lorenzo Branzi,<sup>1</sup> Shelley

Stafford,<sup>1</sup> Faisal Ali Alhammad,<sup>1</sup> Olan Cleary,<sup>1</sup> Munirah Ghariani,<sup>1</sup> Vera Kuznetsova,<sup>1</sup> and

Yurii K. Gun'ko<sup>\*1,2</sup>

<sup>1</sup> School of Chemistry, Trinity College Dublin, D02PN40, Dublin, Ireland.

<sup>2</sup> BiOrbic Bioeconomy SFI Research Centre, University College Dublin, D04 F438, Dublin, Ireland

<sup>3</sup> Chemical & BioPharmaceutical Science, Technological University Dublin, Grangegorman, D07 H6K8, Dublin, Ireland

<sup>4</sup> School of Physics, Trinity College Dublin, D02PN40, Dublin.

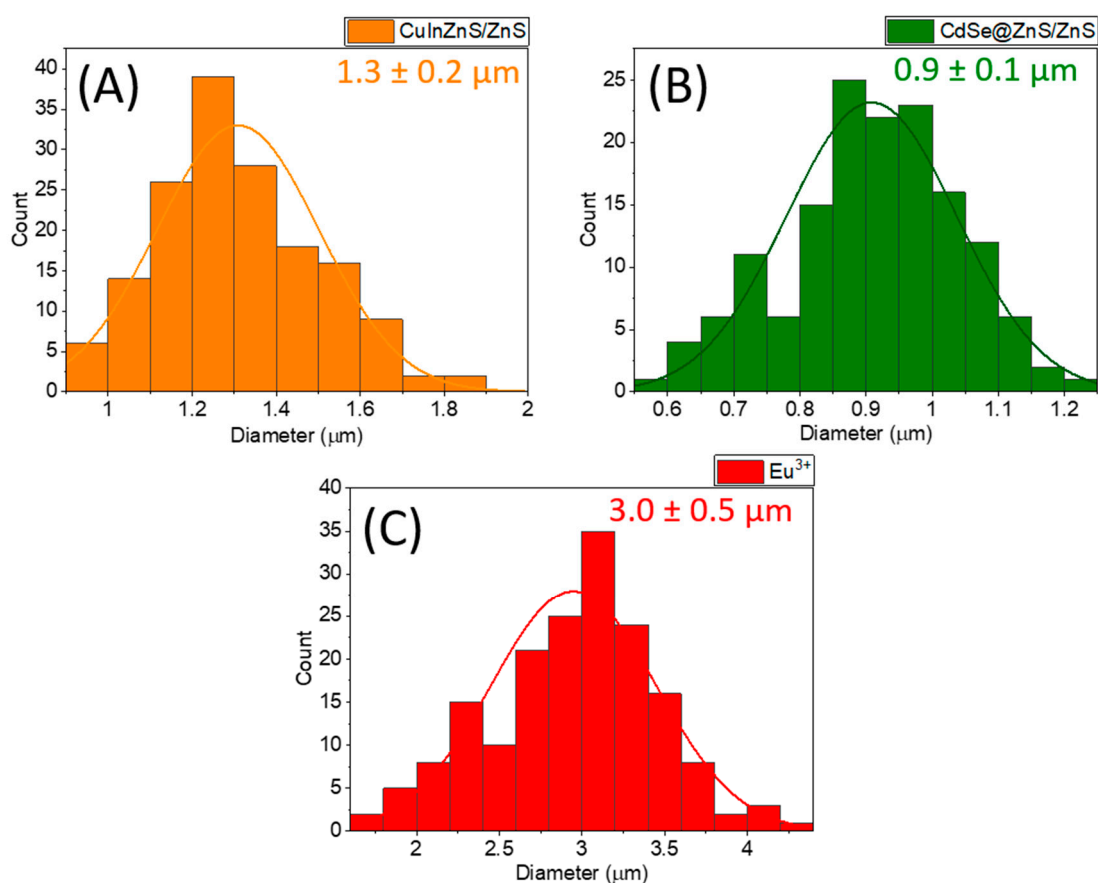

Figure S1. Size distributions of (A) CuInZnS/ZnS (B) CdSe@ZnS/ZnS loaded and (C) Eu<sup>3+</sup> doped microspheres where  $N = 160, 150$  and  $175$ , respectively. .

### Additional SEM Images

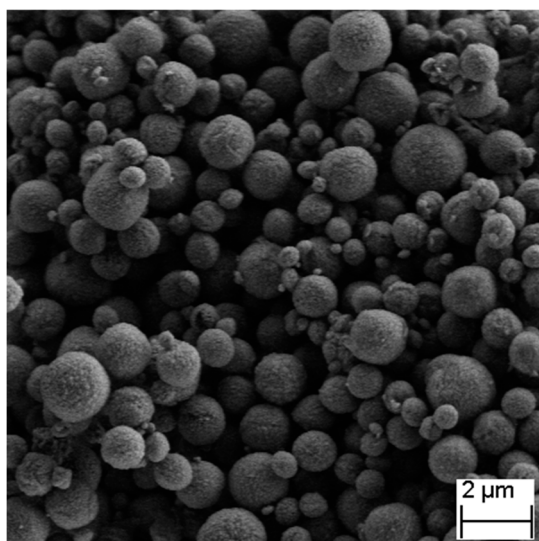

Figure S2. Achiral  $\text{CaCO}_3$  composites.

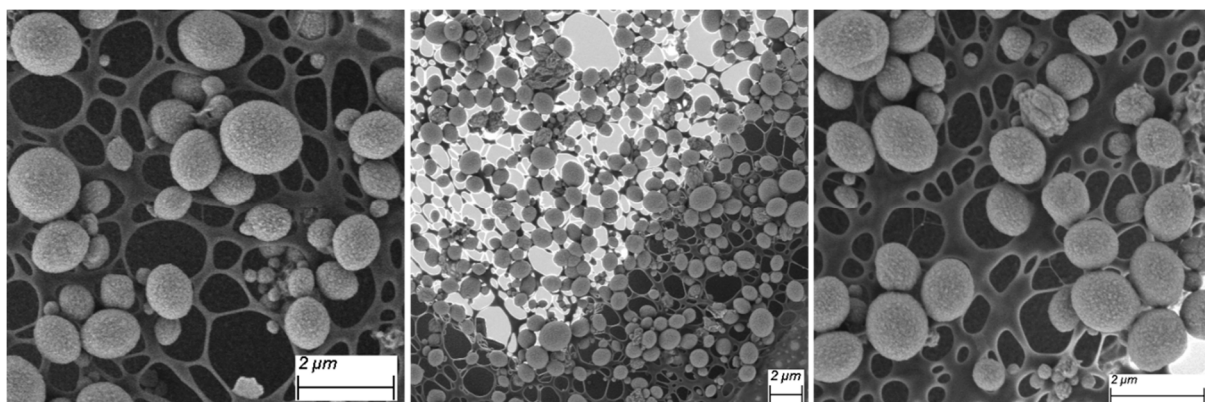

Figure S3. SEM images of  $\text{CaCO}_3$  composites loaded with  $\text{CuInZnS}:\text{ZnS}$  QDs.

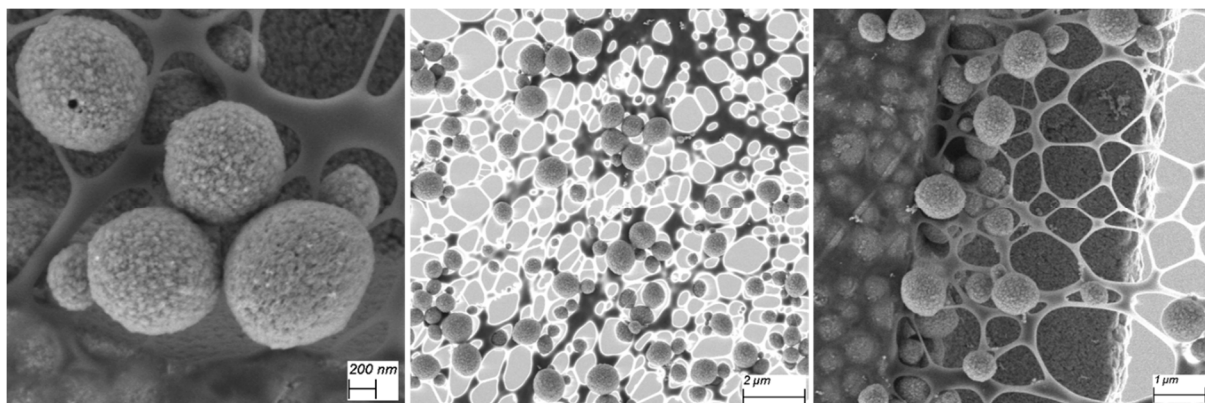

Figure S4. SEM images of  $\text{CaCO}_3$  composites loaded with  $\text{CdSe}@\text{ZnS}/\text{ZnS}$  QDs.

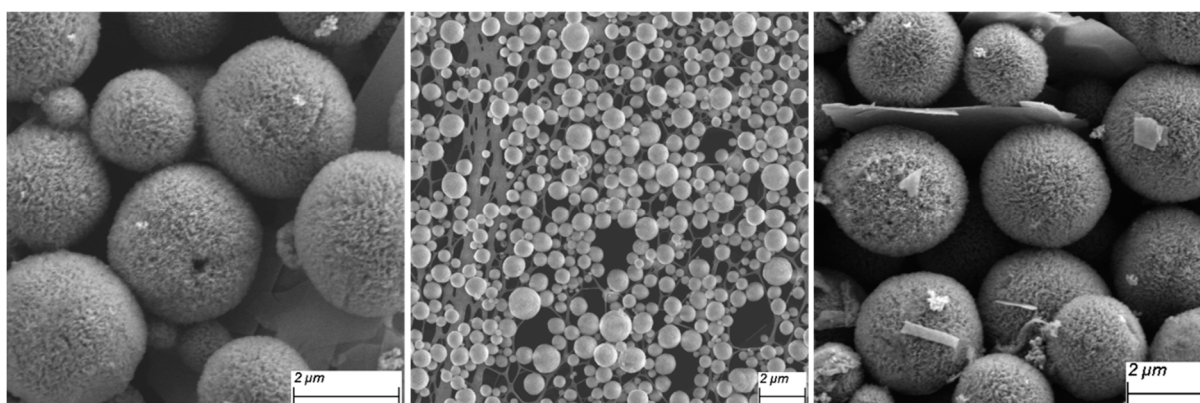

Figure S5. SEM images of  $\text{Eu}^{3+}$  doped  $\text{CaCO}_3$  composites.

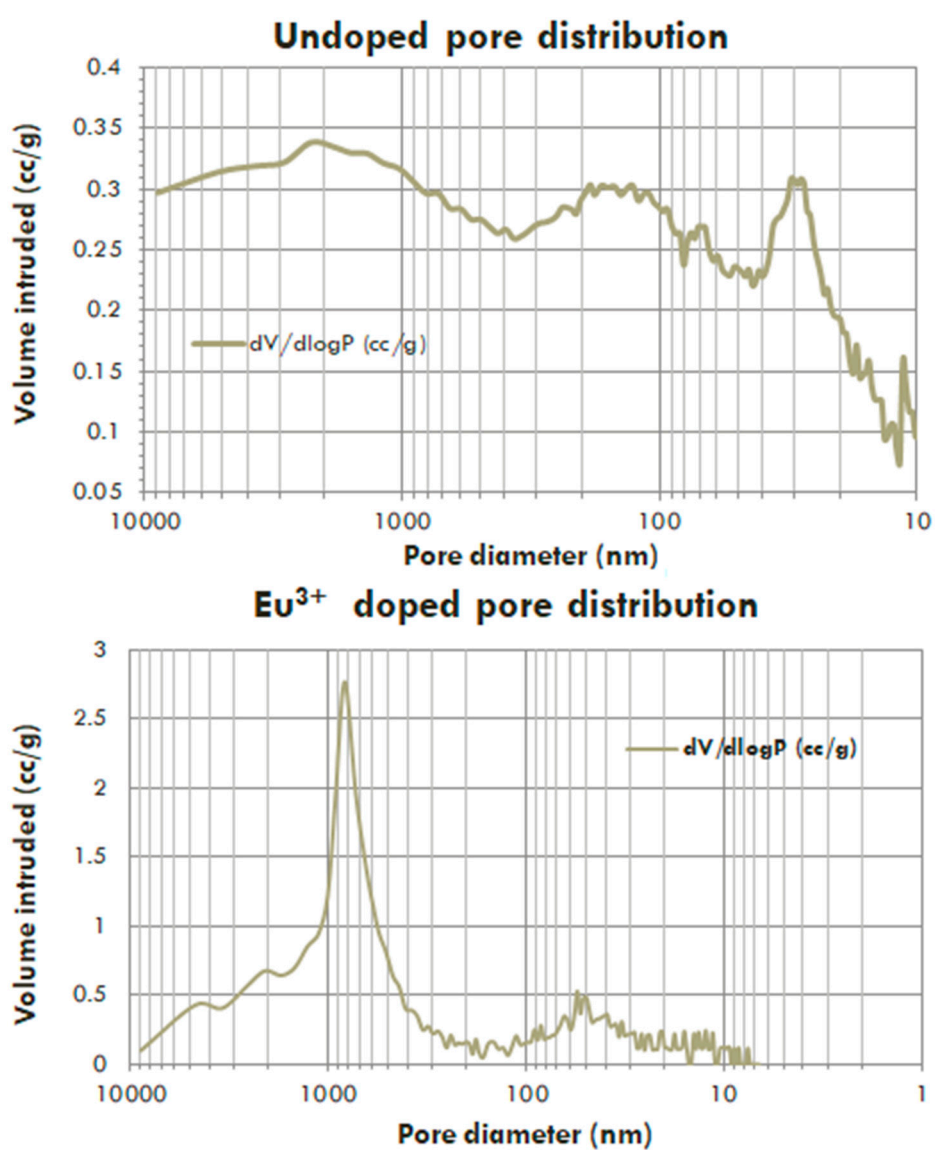

Figure S6. Mercury porosimetry measurements of doped and undoped  $\text{CaCO}_3$  composites. In the undoped composites there are two main pore sizes of 30 and 11 nm. In the doped samples, the

average pore diameter is c. 70 nm. In both plots, the large peaks at higher diameters correspond to voids between the microspheres and can therefore be discounted.

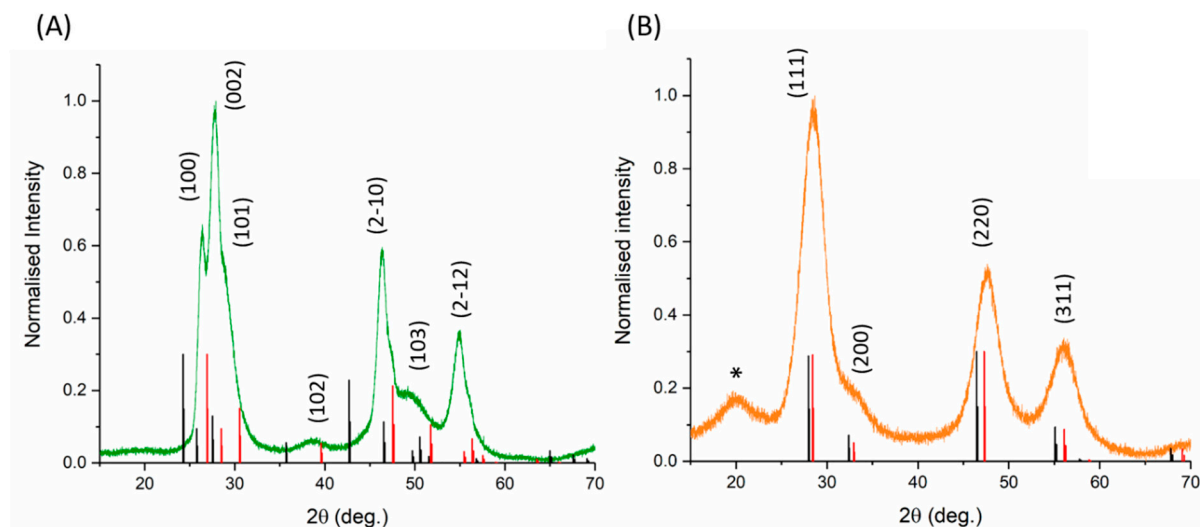

Figure S7. A) XRD pattern of CdSe@ZnS/ZnS QDs, reference pattern: CdSe wurtzite phase (black) ICSD 415784 and ZnS wurtzite phase (red) 67453. B) XRD pattern of CuInZnS/ZnS QDs, reference patterns: Cu<sub>2</sub>SnInS<sub>4</sub> sphalerite phase (black) and ZnS sphalerite phase (red). The asterisk marks the residual contribution from organic ligands.

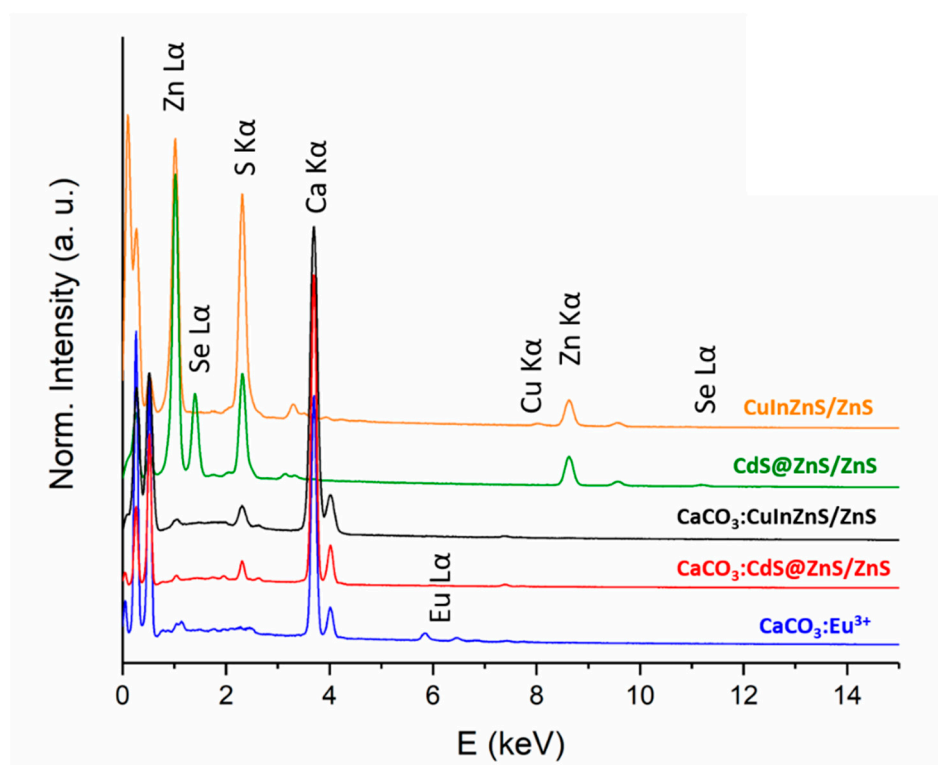

Figure S8. EDS spectra of CdSe@ZnS/ZnS, CuInZnS/ZnS QDs and the different CaCO<sub>3</sub> composites.

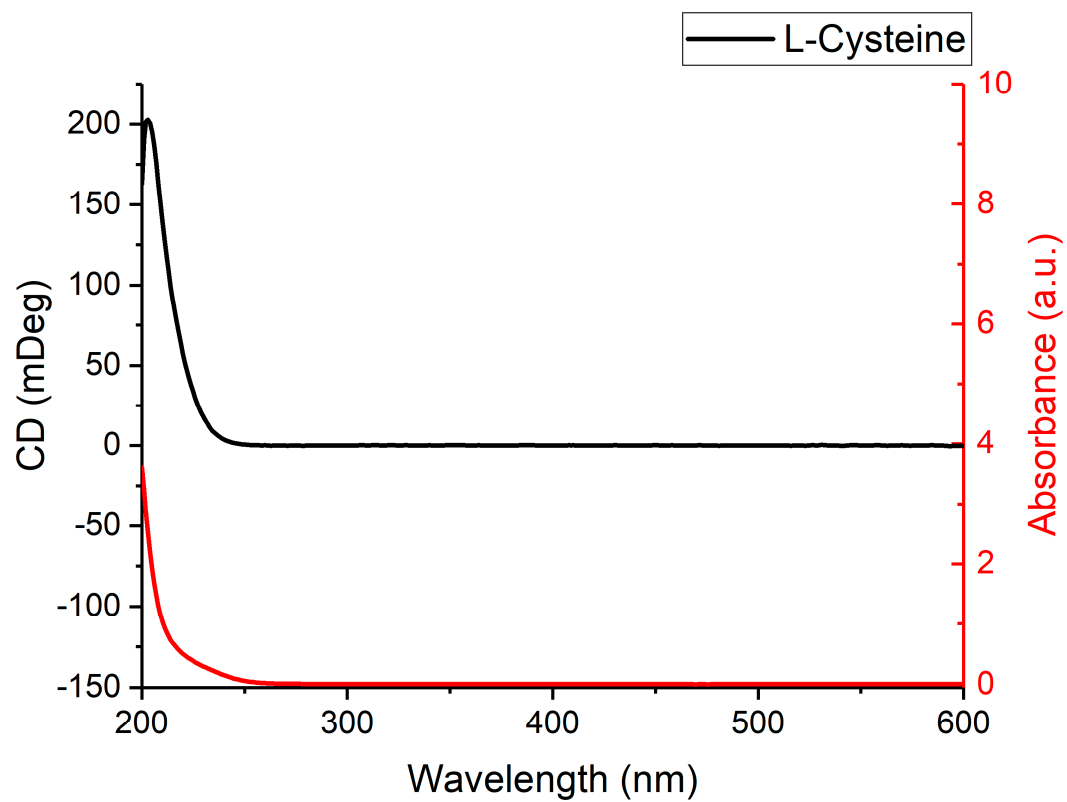

Figure S9. CD spectrum of *L*-cysteine in water.

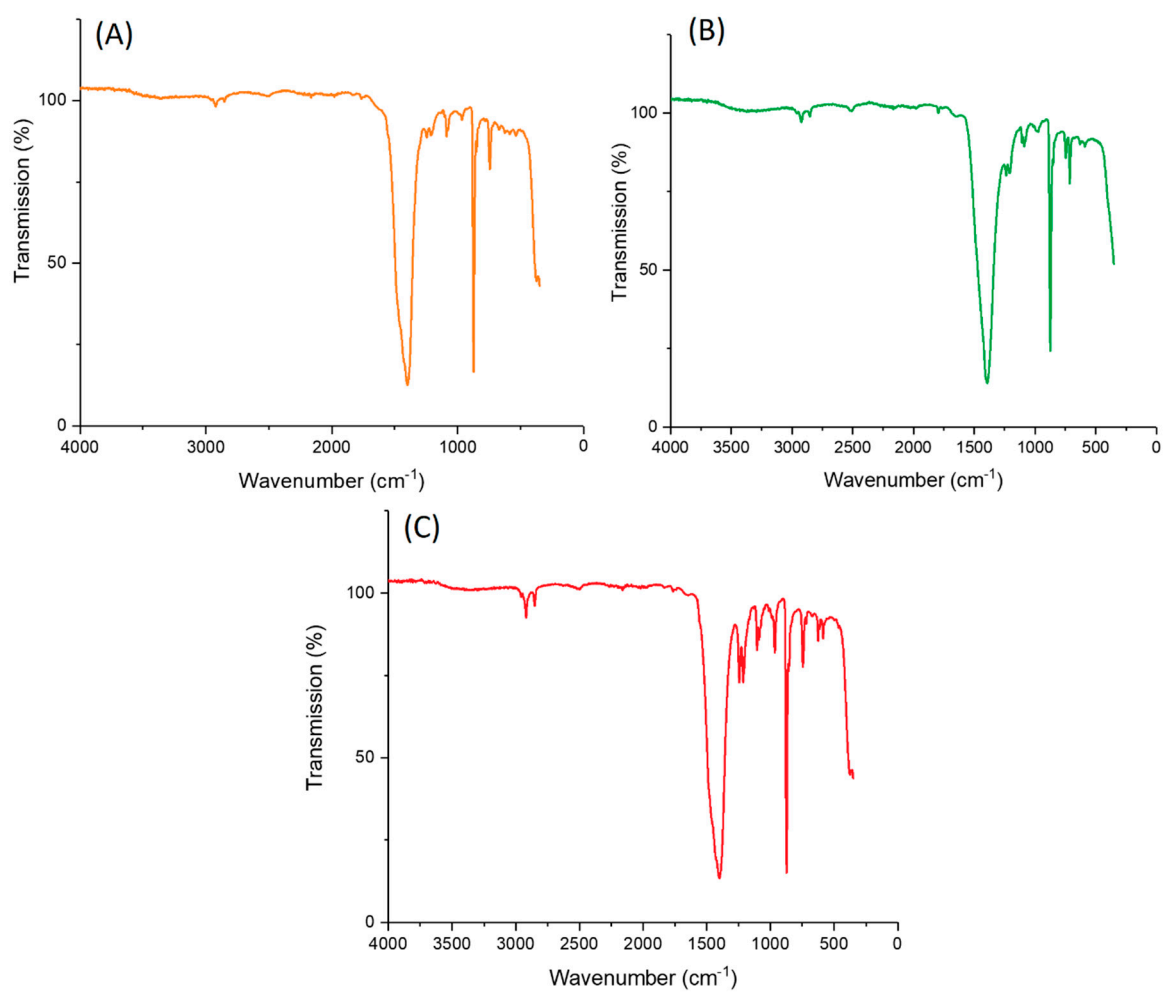

Figure S10. FT-IR spectra of the composites loaded with (A) CuInZnS/ZnS, (B) CdSe@ZnSZnS and (C) doped with Eu<sup>3+</sup> illustrating the presence of cysteine as evidenced by its characteristic peaks at 3000 cm<sup>-1</sup>.
